# Supplementary material for: Comparison of different methods for the absolute quantification of harbour seal transferrin glycoforms using HPLC-ICP-MS
Source: Royal Society of Chemistry journal article supplement (doi:10.1039/c2ja10287k), 2012-01-01
Supplement: c2ja10287k.pdf [file c2ja10287k.pdf]

## Comparison of different methods for the absolute quantification of harbour seal transferrin glycoforms using HPLC-ICP-MS

Mechthild Grebe, Daniel Pröfrock, Antje Kakuschke, M. Estella del Castillo Busto, Maria Montes-Bayon, Alfredo Sanz-Medel, Jose A.C. Broekaert and Andreas Prange

**Table S-1:** Comparison of the total Tf concentration, the concentration of the dominate glycoform S<sub>4</sub>, CDT percentage and Tf saturation for 15 harbour seal serum samples, the red highlighted data are the concentrations of the four animals with elevated CDT level

| sample   | IDA                        |                                          |                |                             |                                           |            |                                        |                                                     |                             |
|----------|----------------------------|------------------------------------------|----------------|-----------------------------|-------------------------------------------|------------|----------------------------------------|-----------------------------------------------------|-----------------------------|
|          | Tf<br>[g L <sup>-1</sup> ] | SD <sub>Tf</sub><br>[g L <sup>-1</sup> ] | Tf-Sät.<br>[%] | CDT<br>[g L <sup>-1</sup> ] | SD <sub>CDT</sub><br>[g L <sup>-1</sup> ] | CDT<br>[%] | S <sub>4</sub><br>[g L <sup>-1</sup> ] | SD <sub>S<sub>4</sub></sub><br>[g L <sup>-1</sup> ] | S <sub>4</sub> -Sät.<br>[%] |
| seal 1   | <b>1,75</b>                | 0,02                                     | 33,74          | <b>0,12</b>                 | 0,01                                      | 7,06       | <b>1,38</b>                            | 0,02                                                | 35,61                       |
| seal 2   | <b>1,73</b>                | 0,01                                     | 27,14          | <b>0,09</b>                 | 0,01                                      | 5,37       | <b>1,02</b>                            | 0,12                                                | 27,28                       |
| seal 3   | <b>2,01</b>                | 0,02                                     | 42,52          | <b>0,13</b>                 | 0,01                                      | 6,26       | <b>1,65</b>                            | 0,00                                                | 44,81                       |
| seal 4   | <b>2,64</b>                | 0,13                                     | 41,41          | <b>0,13</b>                 | 0,01                                      | 4,94       | <b>1,83</b>                            | 0,03                                                | 42,95                       |
| seal 5   | <b>2,35</b>                | -                                        | 34,71          | <b>0,58</b>                 | -                                         | 24,57      | <b>1,69</b>                            | -                                                   | 50,78                       |
| W01/08Pv | <b>1,94</b>                | 0,02                                     | 46,97          | <b>0,16</b>                 | 0,01                                      | 7,99       | <b>1,45</b>                            | 0,01                                                | 49,13                       |
| W02/08Pv | <b>6,53</b>                | 0,07                                     | 16,63          | <b>4,49</b>                 | 0,08                                      | 68,68      | <b>1,72</b>                            | 0,02                                                | 45,05                       |
| W03/08Pv | <b>1,74</b>                | 0,12                                     | 36,58          | <b>0,13</b>                 | 0,04                                      | 7,16       | <b>1,45</b>                            | 0,03                                                | 38,16                       |
| W04/08Pv | <b>3,86</b>                | 0,14                                     | 19,92          | <b>1,83</b>                 | 0,18                                      | 47,47      | <b>1,70</b>                            | 0,02                                                | 30,43                       |
| W05/08Pv | <b>2,37</b>                | 0,03                                     | 35,74          | <b>0,09</b>                 | 0,03                                      | 3,74       | <b>1,92</b>                            | 0,01                                                | 36,96                       |
| seal A   | <b>5,25</b>                | 0,08                                     | 12,79          | <b>2,61</b>                 | 0,03                                      | 49,69      | <b>2,13</b>                            | 0,04                                                | 18,70                       |
| seal B   | <b>2,41</b>                | 0,03                                     | 31,28          | <b>0,04</b>                 | 0,01                                      | 1,59       | <b>1,92</b>                            | 0,05                                                | 29,37                       |
| seal C   | <b>2,75</b>                | 0,07                                     | 33,25          | <b>0,24</b>                 | 0,05                                      | 8,68       | <b>2,10</b>                            | 0,01                                                | 33,56                       |
| seal D   | <b>2,32</b>                | 0,03                                     | 16,28          | <b>0,10</b>                 | 0,01                                      | 4,18       | <b>1,84</b>                            | 0,03                                                | 11,19                       |
| seal E   | <b>2,54</b>                | 0,04                                     | 16,30          | <b>0,00</b>                 | 0,00                                      | 0,00       | <b>2,19</b>                            | 0,03                                                | 15,46                       |

  

| sample   | FIA                        |                                          |                             |                                           |                             |                                        |                                                     | Differenz(IDA-FIA)         |                             |                                        |
|----------|----------------------------|------------------------------------------|-----------------------------|-------------------------------------------|-----------------------------|----------------------------------------|-----------------------------------------------------|----------------------------|-----------------------------|----------------------------------------|
|          | Tf<br>[g L <sup>-1</sup> ] | SD <sub>Tf</sub><br>[g L <sup>-1</sup> ] | CDT<br>[g L <sup>-1</sup> ] | SD <sub>CDT</sub><br>[g L <sup>-1</sup> ] | CDT<br>[g L <sup>-1</sup> ] | S <sub>4</sub><br>[g L <sup>-1</sup> ] | SD <sub>S<sub>4</sub></sub><br>[g L <sup>-1</sup> ] | Tf<br>[g L <sup>-1</sup> ] | CDT<br>[g L <sup>-1</sup> ] | S <sub>4</sub><br>[g L <sup>-1</sup> ] |
| seal 1   | <b>1,62</b>                | 0,01                                     | <b>0,00</b>                 | 0,00                                      | 0,00                        | <b>1,41</b>                            | 0,03                                                | 0,13                       | 0,12                        | 0,03                                   |
| seal 2   | <b>1,56</b>                | 0,04                                     | <b>0,00</b>                 | 0,00                                      | 0,00                        | <b>1,35</b>                            | 0,07                                                | 0,17                       | 0,09                        | 0,33                                   |
| seal 3   | <b>1,98</b>                | 0,03                                     | <b>0,04</b>                 | 0,03                                      | 1,96                        | <b>1,71</b>                            | 0,02                                                | 0,03                       | 0,09                        | 0,06                                   |
| seal 4   | <b>2,63</b>                | 0,11                                     | <b>0,03</b>                 | 0,01                                      | 1,14                        | <b>2,32</b>                            | 0,11                                                | 0,01                       | 0,10                        | 0,49                                   |
| seal 5   | <b>2,05</b>                | 0,07                                     | <b>0,19</b>                 | 0,03                                      | 9,27                        | <b>1,65</b>                            | 0,05                                                | <b>0,30</b>                | <b>0,39</b>                 | 0,04                                   |
| W01/08Pv | <b>1,81</b>                | 0,09                                     | <b>0,02</b>                 | 0,02                                      | 1,31                        | <b>1,61</b>                            | 0,04                                                | 0,13                       | 0,13                        | 0,16                                   |
| W02/08Pv | <b>2,94</b>                | 0,09                                     | <b>0,91</b>                 | 0,13                                      | 31,06                       | <b>1,85</b>                            | 0,04                                                | <b>3,59</b>                | <b>3,57</b>                 | 0,13                                   |
| W03/08Pv | <b>1,65</b>                | 0,07                                     | <b>0,01</b>                 | 0,01                                      | 0,37                        | <b>1,49</b>                            | 0,03                                                | 0,10                       | 0,12                        | 0,04                                   |
| W04/08Pv | <b>2,50</b>                | 0,01                                     | <b>0,40</b>                 | 0,03                                      | 16,15                       | <b>1,85</b>                            | 0,02                                                | <b>1,35</b>                | <b>1,43</b>                 | 0,15                                   |
| W05/08Pv | <b>2,52</b>                | 0,08                                     | <b>0,06</b>                 | 0,02                                      | 2,23                        | <b>2,13</b>                            | 0,01                                                | 0,15                       | 0,03                        | 0,21                                   |
| seal A   | <b>3,19</b>                | 0,09                                     | <b>0,50</b>                 | 0,07                                      | 15,67                       | <b>2,15</b>                            | 0,04                                                | <b>2,06</b>                | <b>2,11</b>                 | 0,02                                   |
| seal B   | <b>2,54</b>                | 0,06                                     | <b>0,00</b>                 | 0,00                                      | 0,00                        | <b>2,07</b>                            | 0,03                                                | 0,13                       | 0,04                        | 0,15                                   |
| seal C   | <b>2,78</b>                | 0,05                                     | <b>0,10</b>                 | 0,01                                      | 3,60                        | <b>2,24</b>                            | 0,05                                                | 0,03                       | 0,14                        | 0,14                                   |
| seal D   | <b>2,42</b>                | 0,08                                     | <b>0,00</b>                 | 0,00                                      | 0,00                        | <b>2,00</b>                            | 0,04                                                | 0,10                       | 0,10                        | 0,16                                   |
| seal E   | <b>2,58</b>                | 0,09                                     | <b>0,00</b>                 | 0,00                                      | 0,00                        | <b>2,22</b>                            | 0,07                                                | 0,04                       | 0,00                        | 0,03                                   |
